# Supplementary material for: Aberrant bowel movement frequencies coincide with increased microbe-derived blood metabolites associated with reduced organ function
Source: PubMed Central journal article supplement (PMC11293344; doi:10.1016/j.xcrm.2024.101646), 2024-07-16
Supplement: mmc1.pdf [file mmc1.pdf]

**Cell Reports Medicine, Volume 5**

**Supplemental information**

**Aberrant bowel movement frequencies coincide  
with increased microbe-derived blood metabolites  
associated with reduced organ function**

**Johannes P. Johnson-Martínez, Christian Diener, Anne E. Levine, Tomasz Wilmanski, David L. Suskind, Alexandra Ralevski, Jennifer Hadlock, Andrew T. Magis, Leroy Hood, Noa Rappaport, and Sean M. Gibbons**

1 **SUPPLEMENTAL FIGURES AND TABLES**

| Covariates:                                                                                                                                                                                                                                                                                         | Mean ± standard deviation, or % across Arivale:                                    |
|-----------------------------------------------------------------------------------------------------------------------------------------------------------------------------------------------------------------------------------------------------------------------------------------------------|------------------------------------------------------------------------------------|
| Gender                                                                                                                                                                                                                                                                                              | 65.1% Female                                                                       |
| BMI                                                                                                                                                                                                                                                                                                 | 27.2 ± 5.89                                                                        |
| Age                                                                                                                                                                                                                                                                                                 | 46.36 ± 12.96                                                                      |
| eGFR                                                                                                                                                                                                                                                                                                | 89.07 ± 20.20                                                                      |
| CRP                                                                                                                                                                                                                                                                                                 | 2.40 ± 4.76                                                                        |
| LDL                                                                                                                                                                                                                                                                                                 | 114.17 ± 33.77                                                                     |
| A1C                                                                                                                                                                                                                                                                                                 | 5.49 ± 0.57                                                                        |
| Highlighted exclusionary criteria:                                                                                                                                                                                                                                                                  |                                                                                    |
| Percent with self-reported kidney disease:                                                                                                                                                                                                                                                          | 3.00% (119 out of 3,955 participants with BMF data available withheld from cohort) |
| Percent IBS or IBD:                                                                                                                                                                                                                                                                                 | 3.23% (128 out of 3,955 participants with BMF data available withheld from cohort) |
| Exclusionary features (988 out of 3,955 participants with BMF data, or 25% of the initial BMF cohort, answered affirmatively to any of these and were excluded from the analyses. The final N of remaining participants after merging with covariates was N = 1,425 for the final baseline cohort): |                                                                                    |
| Self - current history - bladder infection                                                                                                                                                                                                                                                          |                                                                                    |
| Self - current history - kidney disease                                                                                                                                                                                                                                                             |                                                                                    |
| Self - current history - kidney infection                                                                                                                                                                                                                                                           |                                                                                    |
| Self - current history - kidney stones                                                                                                                                                                                                                                                              |                                                                                    |
| Self - current history - bladder/kidney - other                                                                                                                                                                                                                                                     |                                                                                    |
| Self - current history - polycystic kidney disease (PKD)                                                                                                                                                                                                                                            |                                                                                    |
| Self - current history - urinary incontinence                                                                                                                                                                                                                                                       |                                                                                    |
| Self - current history - kidney cancer                                                                                                                                                                                                                                                              |                                                                                    |
| Self - current history - celiac disease                                                                                                                                                                                                                                                             |                                                                                    |
| Self - current history - colonic Crohn's disease                                                                                                                                                                                                                                                    |                                                                                    |
| Self - current history - diverticulosis                                                                                                                                                                                                                                                             |                                                                                    |
| Self - current history - gastroesophageal reflux disease (GERD)                                                                                                                                                                                                                                     |                                                                                    |
| Self - current history - ileal Crohn's disease                                                                                                                                                                                                                                                      |                                                                                    |
| Self - current history - irritable bowel syndrome (IBS)                                                                                                                                                                                                                                             |                                                                                    |
| Self - current history - inflammatory bowel disease (IBD)                                                                                                                                                                                                                                           |                                                                                    |
| Self - current history - ulcerative colitis                                                                                                                                                                                                                                                         |                                                                                    |
| Self - current history - peptic ulcer                                                                                                                                                                                                                                                               |                                                                                    |
| Self - laxatives usage                                                                                                                                                                                                                                                                              |                                                                                    |
| Self - anticoagulation or cholesterol drugs usage                                                                                                                                                                                                                                                   |                                                                                    |
| Self - blood pressure drugs usage                                                                                                                                                                                                                                                                   |                                                                                    |

2

3 **Table S1. The modeling covariates and exclusionary criteria, related to results in Figures**

4 **2-7.** Out of the 3,955 total Arivale participants that had BMF data, 3.00% self-reported kidney  
 5 disease (the kidney-related questions in the exclusionary features) and 3.23% self-reported IBS  
 6 or IBD. An initial baseline cohort of 3,132 participants that had health history survey questionnaire  
 7 data was available. The participants that answered affirmatively to the exclusionary features were  
 8 removed from the analysis, resulting in 25% of the initial cohort with BMF data being filtered down  
 9 to N = 1,561, and subsequently, a final baseline cohort of 1,425 individuals after merging for  
 10 covariates.

11

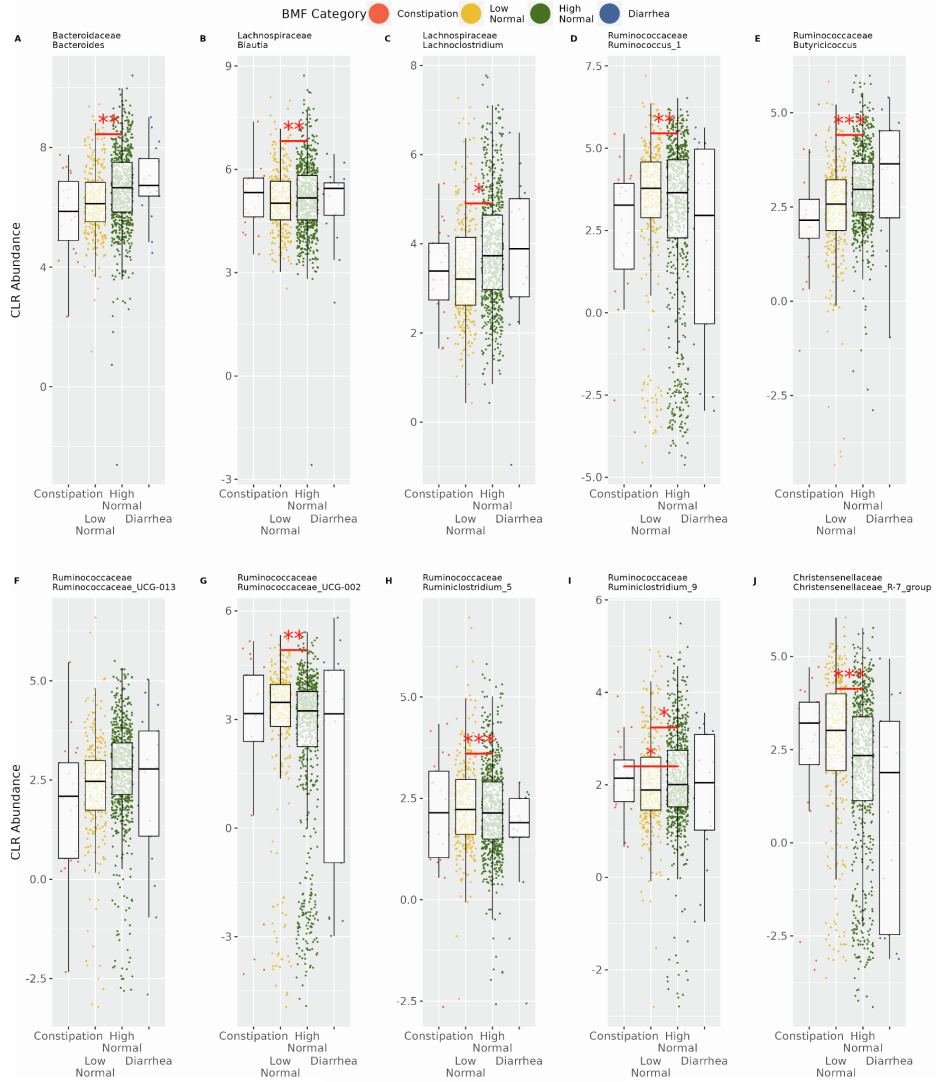

Low BMF ↔ High BMF

13 **Figure S1. The top 10 most abundant genera significantly associated with BMF (A-J),**  
14 **related to Figure 4.** Significant genera from the CORNCOB analysis in order of decreasing CLR-  
15 transformed abundance. The line in each plot denotes significant differences from the reference  
16 category (“High Normal” BMF), and asterisks denote FDR-corrected significance threshold. (\*\*\*):  
17  $p < 0.0001$ , (\*\*):  $0.0001 < p < 0.01$ , (\*):  $0.01 < p < 0.05$ . The horizontal axes are annotated as four  
18 BMF categories: “Constipation” (BMF = 1-2× per week), “Low Normal” (BMF = 3-6× per week),  
19 “High Normal” (BMF = 1-3× per day) which is the reference category in regression, and “Diarrhea”  
20 (BMF = 4× or more per day).

21

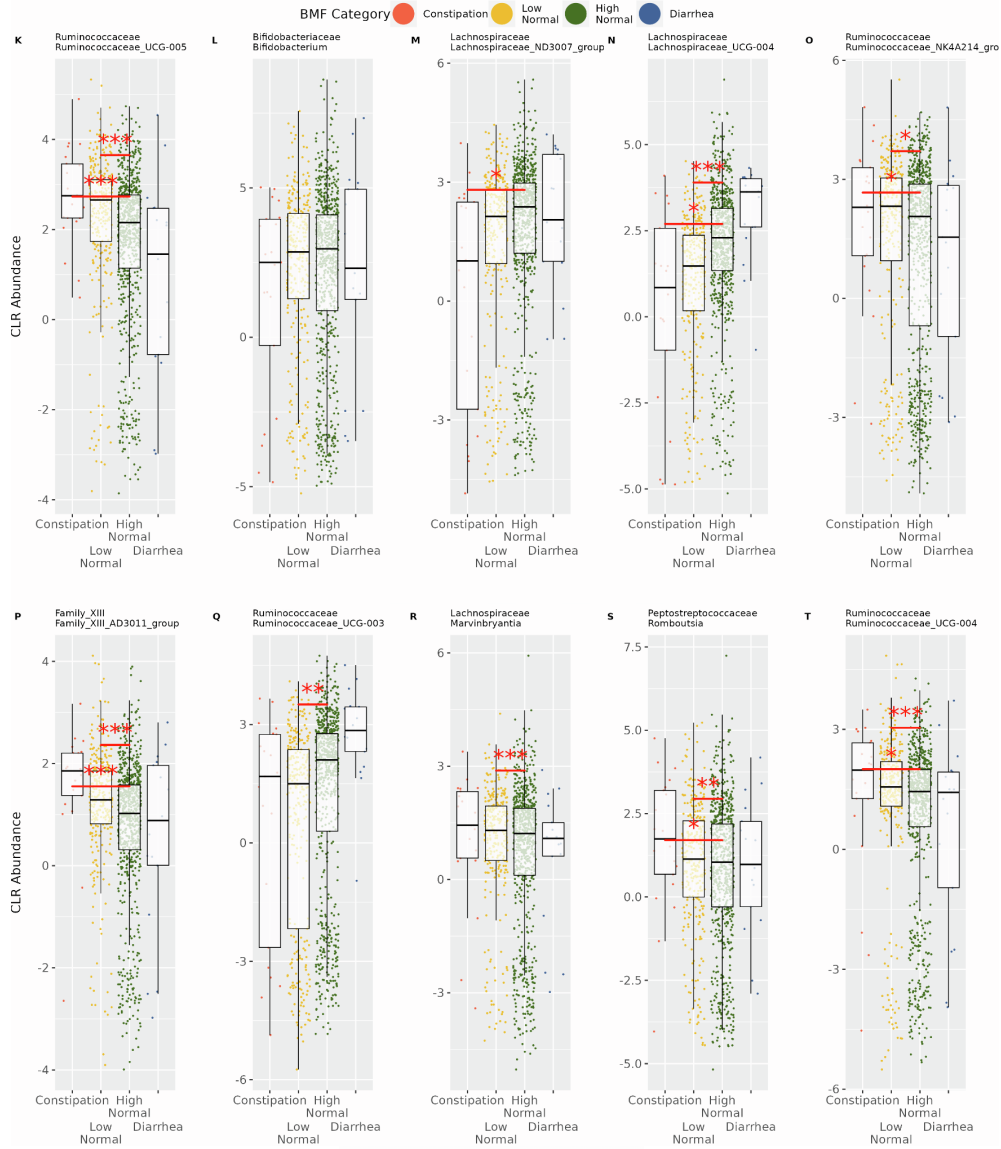

Low BMF ↔ High BMF

23 **Figure S2. The top 11-20 most abundant genera associated with BMF (K-T), related to**  
24 **Figure 4.** Significant genera from the CORNCOB analysis in order of decreasing CLR-  
25 transformed abundance. The line in each plot denotes significant differences from the reference  
26 category (“High Normal” BMF), and asterisks denote FDR-corrected significance threshold. (\*\*\*):  
27  $p < 0.0001$ , (\*\*):  $0.0001 < p < 0.01$ , (\*):  $0.01 < p < 0.05$ . The horizontal axes are annotated as four  
28 BMF categories: “Constipation” (BMF = 1-2× per week), “Low Normal” (BMF = 3-6× per week),  
29 “High Normal” (BMF = 1-3× per day) which is the reference category in regression, and “Diarrhea”  
30 (BMF = 4× or more per day).

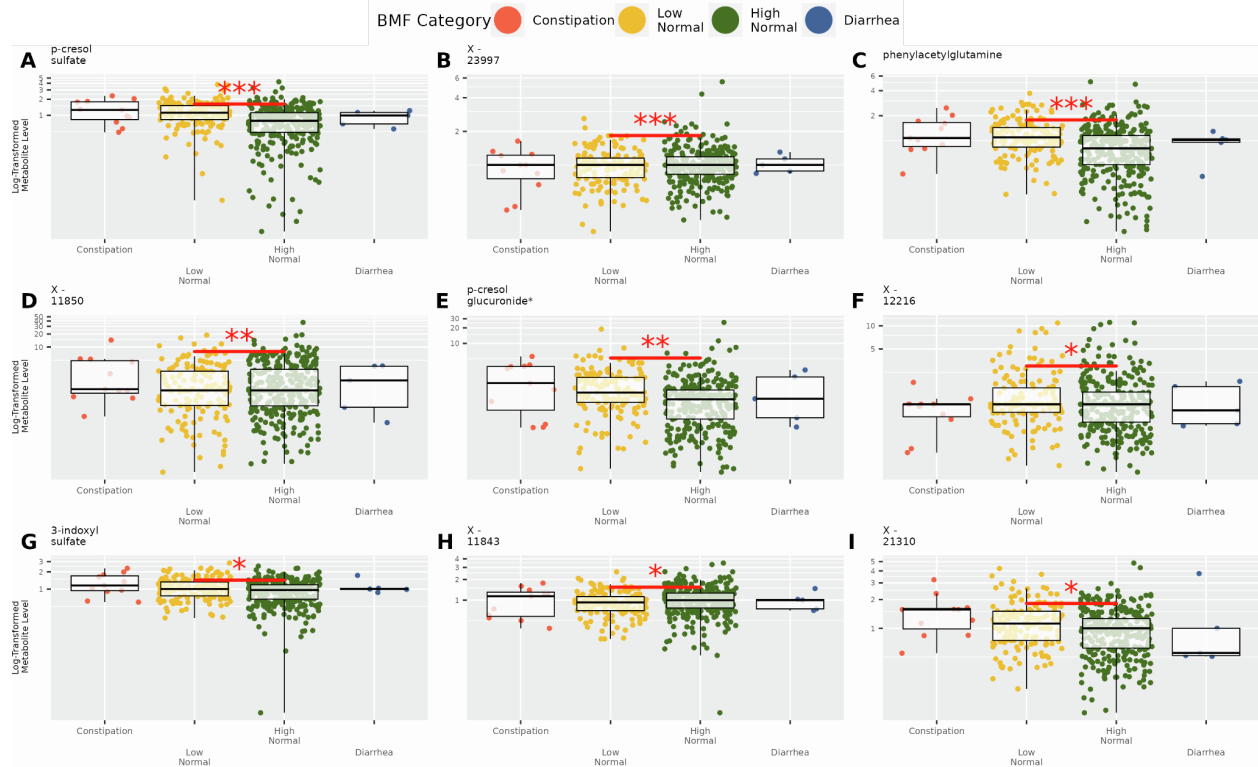

Low BMF ↔ High BMF

31  
 32  
 33 **Figure S3. Significant BMF-associated plasma metabolites boxplots (A-I), related to Figure**  
 34 **5.** Significant plasma metabolites from the LIMMA analysis. The horizontal axes are annotated as  
 35 four BMF categories: “Constipation” (BMF = 1-2× per week), “Low Normal” (BMF = 3-6× per  
 36 week), “High Normal” (BMF = 1-3× per day) which is the reference category in regression, and  
 37 “Diarrhea” (BMF = 4× or more per day). Red significant comparison lines across each plot denote  
 38 significant differences from the reference category (“High Normal” BMF), and asterisks denote  
 39 FDR-corrected significance threshold. (\*\*\*):  $p < 0.0001$ , (\*\*):  $0.0001 < p < 0.01$ , (\*):  $0.01 < p <$   
 40  $0.05$ .

BMF Category ● Constipation ● Low Normal ● High Normal ● Diarrhea

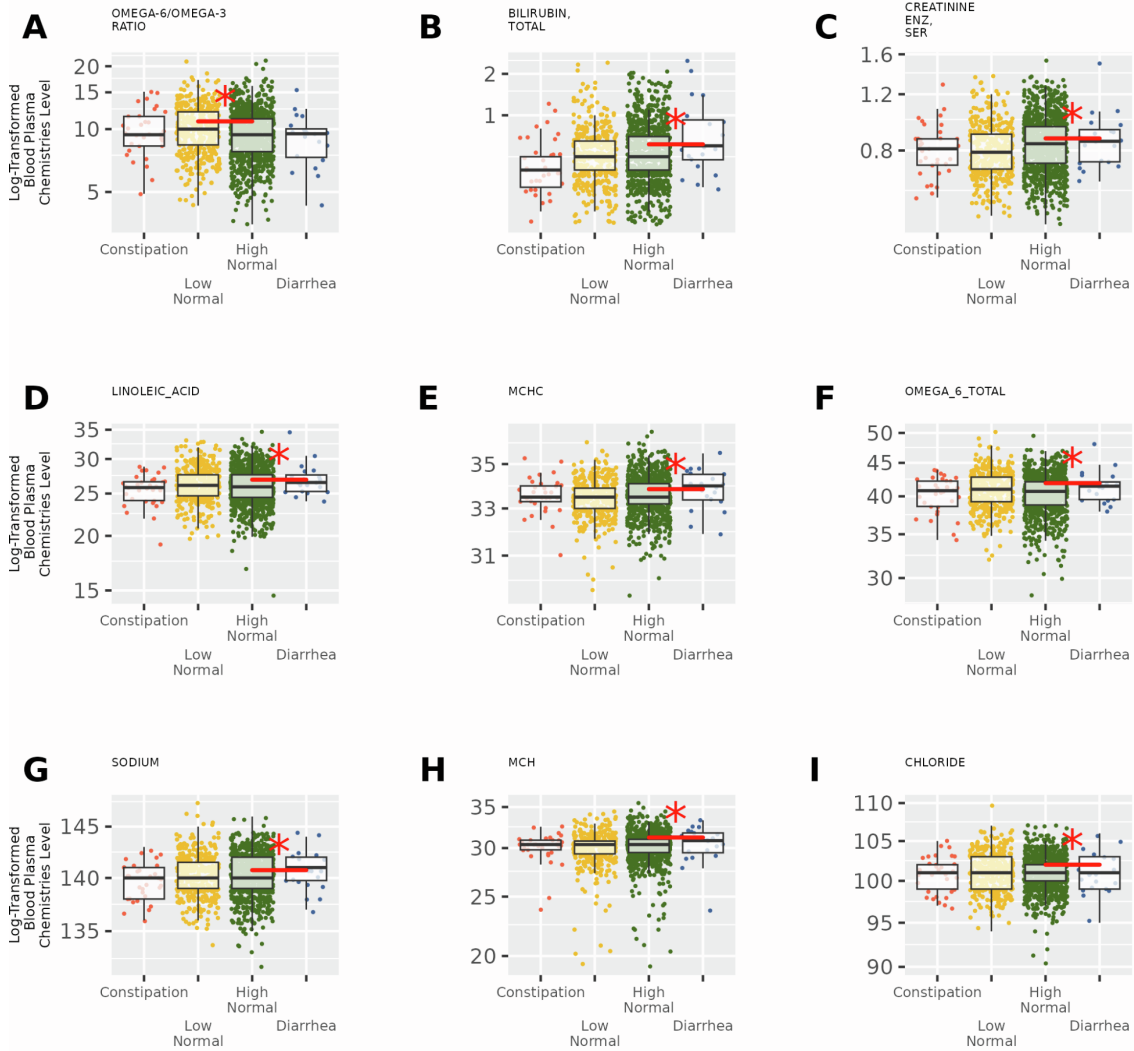

Low BMF ↔ High BMF



42 **Figure S4. Significant BMF-associated clinical chemistries boxplots (A-I), related to Figure**  
43 **6.** Significant clinical chemistries from the LIMMA analysis. The horizontal axes are annotated as  
44 four BMF categories: “Constipation” (BMF = 1-2× per week), “Low Normal” (BMF = 3-6× per  
45 week), “High Normal” (BMF = 1-3× per day) which is the reference category in regression, and  
46 “Diarrhea” (BMF = 4× or more per day). Red significant comparison lines across each plot denote  
47 significant differences from the reference category (“High Normal” BMF), and asterisks denote  
48 FDR-corrected significance threshold. (\*\*\*):  $p < 0.0001$ , (\*\*):  $0.0001 < p < 0.01$ , (\*):  $0.01 < p <$   
49  $0.05$ .

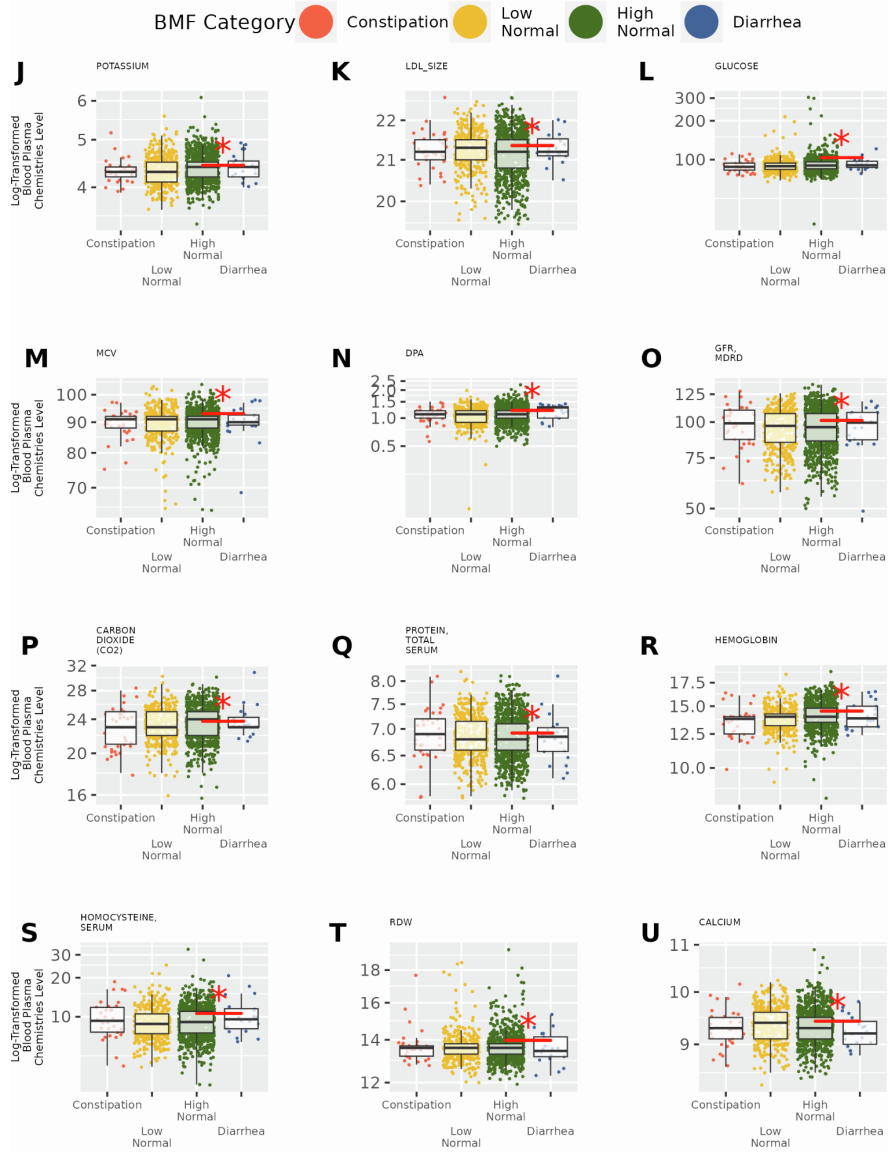

Low BMF ↔ High BMF

51 **Figure S5. The remaining significant BMF-associated clinical chemistries boxplots (J-U),**  
 52 **related to Figure 6.** The remaining significant clinical chemistries from the LIMMA analysis. The  
 53 horizontal axes are annotated as four BMF categories: “Constipation” (BMF = 1-2X per week),  
 54 “Low Normal” (BMF = 3-6X per week), “High Normal” (BMF = 1-3X per day) which is the reference  
 55 category in regression, and “Diarrhea” (BMF = 4X or more per day). Red significant comparison  
 56 lines across each plot denote significant differences from the reference category (“High Normal”  
 57 BMF), and asterisks denote FDR-corrected significance threshold. (\*\*):  $p < 0.0001$ , (\*\*):  $0.0001$   
 58  $< p < 0.01$ , (\*):  $0.01 < p < 0.05$ .

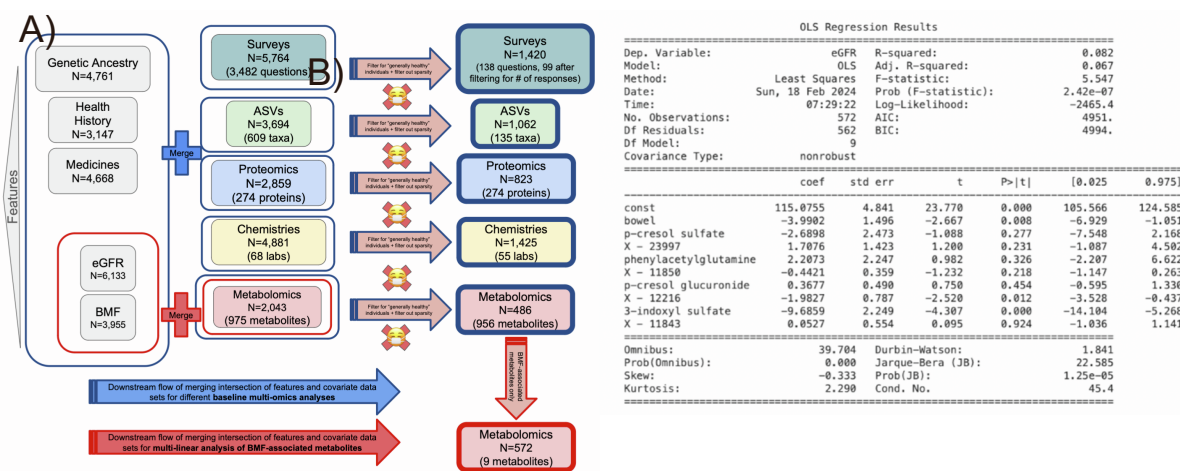

60 **Figure S6. A) Flow Chart for Cohort Selection of Baseline Population, related to the**  
61 **Generally-healthy cohort section of the STAR Methods. B) OLS regression resulting from**  
62 **eGFR ~ BMF-associated metabolites + BMF, related to Figure 7B. A)** Individuals with the full  
63 complement of covariate data (gender, age, BMI, and CRP, LDL, A1C, and PCs 1-3) were further  
64 filtered for having available baseline data for each of the following: surveys, microbiome profiles,  
65 proteomics, clinical chemistries (e.g. complete blood count, or CBC; and comprehensive  
66 metabolic panel, or CMP) and metabolomics. The “generally-healthy” exclusion criteria were then  
67 imposed (38.5% excluded; see Method Details), along with sparsity or non-missingness  
68 minimums for the features in the ‘omics data ( $\geq 30\%$  prevalence for gut microbiome data,  
69 metabolomics and clinical chemistries;  $\geq 50\%$  prevalence for proteomics; and  $\geq 90\%$  prevalence  
70 and  $\geq 10\%$  affirmative for binary responses in the survey questions). These filters resulted in the  
71 final sub-cohort numbers shown on the right side of the figure in blue outlines. Additionally, the  
72 eGFR and BMF data frames were merged with the metabolomics data frame and filtered by the  
73 “generally-healthy” exclusionary criteria for the 9 BMF-associated metabolites eGFR regression  
74 and mediation analysis. B) The p-value for the overall generalized-linear model (eGFR ~ BMF-  
75 related metabolites) was significant (N = 572,  $p = 2.42E-7$ ,  $R^2 = 0.082$ ) and so were the p-values  
76 of the individual  $\beta$ -coefficients for 3-IS ( $\beta_{3-IS} = -9.69$ ,  $p = 1.96E-5$ ), BMF (denoted “bowel”;  $\beta_{BMF} =$   
77  $-3.99$ ,  $p = 7.88E-3$ ), and X - 12216 ( $\beta_{X-12216} = -1.98$ ,  $p = 1.20E-2$ ).
